# Supplementary material
Source: MDPI journal article supplement (https://www.mdpi.com/2073-4344/10/8/911)
Supplement: s1 [file s1]

# **Supporting Information**

## **A DFT Investigation on the Origins of Solvent-Dependent Polysulfide Reduction Mechanism in Rechargeable Li-S Batteries**

Guan-Ying Du, Chi-You Liu, and Elise Y. Li\*

Department of Chemistry, National Taiwan Normal University

No. 88, Section 4, Tingchow Road, Taipei 116, Taiwan

\* Corresponding author E-mail: [eliseytli@ntnu.edu.tw](mailto:eliseytli@ntnu.edu.tw)

Phone: (886)-2-77496219

Fax: (886)-2-29324249

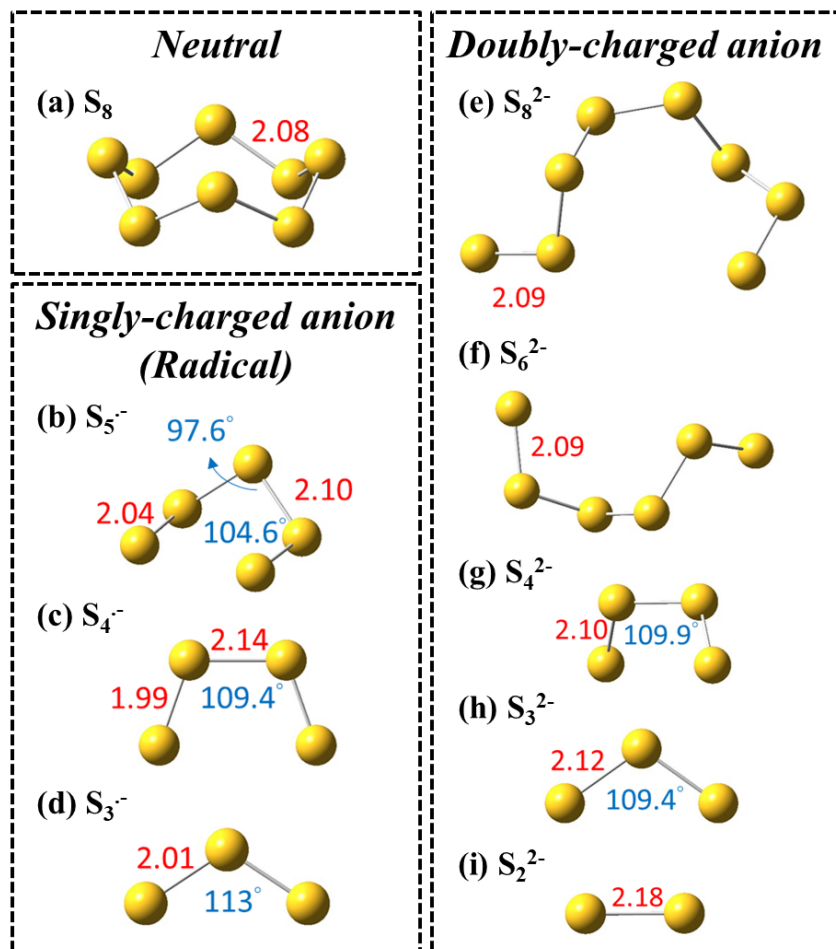

Figure S1. Optimized geometries of (a) neutral, (b-d) singly-charged, and (e-i) doubly-charged polysulfides in DMSO. The average bond lengths of S-S ( $d$ , in Å) and the bond angles ( $\theta$ , in °) are labeled in red and blue, respectively.

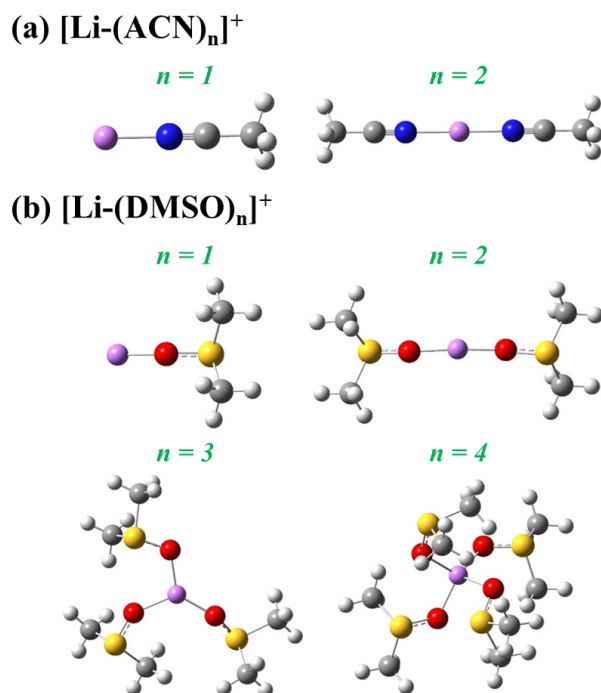

Figure S2. Optimized geometries of (a)  $[\text{Li}-(\text{ACN})_n]^+$  and (b)  $[\text{Li}-(\text{DMSO})_n]^+$  clusters with different solvent coordination numbers ( $n$ ). The colors of element S, Li, C, O, N and H are labeled in yellow, purple, gray, red, blue and white, respectively.

Table S1. Theoretical values and the reported experimental results of reduction potentials ( $\Delta E$ , in V) of  $\text{S}_8$ ,  $\text{S}_8^{2-}$ , and  $\text{S}_3^{\cdot-}$  in different solvents.

| $\Delta E$ (V) | $\text{S}_8 + 2\text{e}^- \rightarrow \text{S}_8^{2-}$ |                   | $\text{S}_8^{2-} + 2\text{e}^- \rightarrow 2\text{S}_4^{2-}$ |                   | $\text{S}_3^{\cdot-} + \text{e}^- \rightarrow \text{S}_3^{2-}$ |                   |
|----------------|--------------------------------------------------------|-------------------|--------------------------------------------------------------|-------------------|----------------------------------------------------------------|-------------------|
| Solvent        | Theo.                                                  | Exp. <sup>a</sup> | Theo.                                                        | Exp. <sup>a</sup> | Theo.                                                          | Exp. <sup>a</sup> |
| DIOX           | 1.07                                                   | -                 | 0.31                                                         | -                 | -0.84                                                          | -                 |
| DOL:DME        | 2.14 <sup>b</sup>                                      | 2.22              | 1.79 <sup>b</sup>                                            | 1.98              | 1.19 <sup>b</sup>                                              | -                 |
| acetone        | 2.44                                                   | -                 | 2.19                                                         | -                 | 1.74                                                           | -                 |
| ACN            | 2.52                                                   | -                 | 2.27                                                         | -                 | 1.87                                                           | -                 |
| DMSO           | 2.54                                                   | 2.70              | 2.30                                                         | 2.29              | 1.92                                                           | 2.10              |

<sup>a</sup> Reported results from ref 1. <sup>b</sup> We adopt the THF solvent model to simulate the mixed-solvent system DOL:DME that is actually used in the experiment.

## References

[1] Q. Zou and Y.-C. Lu *J Phys. Chem. Lett.* **7** (2016) 1518.
